# Supplementary material for: Associations of cardiovascular disease morbidity and mortality in the populations watching major football tournaments: A systematic review and meta-analysis of observational studies
Source: PubMed Central journal article supplement (PMC7220255; doi:10.1097/md.0000000000019534), 2020-03-20
Supplement: medi-99-e19534-s001.pdf [file medi-99-e19534-s001.pdf]

### Search strategy: Pubmed

|     |                                                                |
|-----|----------------------------------------------------------------|
| ID  | Search                                                         |
| #1  | MeSH descriptor: [football] explode all trees                  |
| #2  | MeSH descriptor: [soccer] explode all trees                    |
| #3  | MeSH descriptor: [Cardiovascular Diseases] explode all trees   |
| #4  | MeSH descriptor: [Acute Coronary Syndrome] explode all trees   |
| #5  | MeSH descriptor: [Angina] explode all trees                    |
| #6  | MeSH descriptor: [Arrhythmias] explode all trees               |
| #7  | MeSH descriptor: [Cardiac] explode all trees                   |
| #8  | MeSH descriptor: [Coronary Disease] explode all trees          |
| #9  | MeSH descriptor: [Myocardial Infarction] explode all trees     |
| #10 | MeSH descriptor: [Heart Arrest] explode all trees              |
| #11 | MeSH descriptor: [Death] explode all trees                     |
| #12 | MeSH descriptor: [Sudden] explode all trees                    |
| #13 | MeSH descriptor: [heart failure] explode all trees             |
| #14 | rugby:ti,ab                                                    |
| #15 | “World cup”:ti,ab                                              |
| #16 | “European cup”:ti,ab                                           |
| #17 | (#1 or #2 or #14 or #15 or #16)                                |
| #18 | (#3 or #4 or #5 or #6 or #7 #8 or #9 or #10 or #11 or #12 #13) |
| #19 | #17 and #18                                                    |

### Search strategy: Embase

|     |                                                                        |
|-----|------------------------------------------------------------------------|
| ID  | Search                                                                 |
| #1  | ‘football’ /exp or ‘football’                                          |
| #2  | ‘soccer’ /exp or ‘soccer’                                              |
| #3  | rugby:ab,ti                                                            |
| #4  | ‘world cup’ :ab,ti                                                     |
| #5  | ‘european cup’ :ab,ti                                                  |
| #6  | #1 or #2 or #3 or #4 or #5                                             |
| #7  | ‘Cardiovascular Diseases’ /exp or ‘Cardiovascular Diseases’            |
| #8  | ‘Acute Coronary Syndrome’ /exp or ‘Acute Coronary Syndrome’            |
| #9  | ‘angina pectoris’ /exp or ‘angina pectoris’                            |
| #10 | ‘heart arrhythmia’ /exp or ‘heart arrhythmia’                          |
| #11 | ‘coronary artery disease’ /exp or ‘coronary artery disease’            |
| #12 | ‘ischemic heart disease’ /exp or ‘ischemic heart disease’              |
| #13 | ‘heart infarction’ /exp or ‘heart infarction’                          |
| #14 | ‘acute heart infarction’ /exp or ‘acute heart infarction’              |
| #15 | ‘heart failure’ /exp or ‘heart failure’                                |
| #16 | ‘heart arrest’ /exp or ‘heart arrest’                                  |
| #17 | ‘sudden death’ /exp or ‘sudden death’                                  |
| #18 | #7 or #8 or #9 or #10 or #11 or #12 or #13 or #14 or #15 or #16 or #17 |
| #19 | #6 and #18                                                             |

### Search strategy: Coebrane

| ID  | Search                                                              |
|-----|---------------------------------------------------------------------|
| #1  | MeSH descriptor: [football] explode all trees                       |
| #2  | MeSH descriptor: [Soccer] explode all trees                         |
| #3  | "Rugby":ti,ab,kw (Word variations have been searched)               |
| #4  | World cup:ti,ab,kw (Word variations have been searched)             |
| #5  | European cup:ti,ab,kw (Word variations have been searched)          |
| #6  | #1 or #2 or #3 or #4 or #5                                          |
| #7  | MeSH descriptor: [Cardiovascular Diseases] explode all trees        |
| #8  | MeSH descriptor: [Acute Coronary Syndrome] explode all trees        |
| #9  | MeSH descriptor: [Angina Pectoris] explode all trees                |
| #10 | MeSH descriptor: [Arrhythmias, Cardiac] explode all trees           |
| #11 | MeSH descriptor: [Coronary Disease] explode all trees               |
| #12 | MeSH descriptor: [Myocardial Infarction] explode all trees          |
| #13 | MeSH descriptor: [Heart Arrest] explode all trees                   |
| #14 | MeSH descriptor: [Death] explode all trees                          |
| #15 | MeSH descriptor: [Death, Sudden, Cardiac] explode all trees         |
| #16 | MeSH descriptor: [Heart Failure] explode all trees                  |
| #17 | (#7or #8 or #9 or #10 or #11or # 12 or # 13 or # 14 or # 15 or #16) |
| #18 | #6 and #17                                                          |
