# Supplementary material for: Associations of cardiovascular disease morbidity and mortality in the populations watching major football tournaments: A systematic review and meta-analysis of observational studies
Source: PubMed Central journal article supplement (PMC7220255; doi:10.1097/md.0000000000019534), 2020-03-20
Supplement: medi-99-e19534-s002.pdf [file medi-99-e19534-s002.pdf]

| Study                                    | Competition                                | Comparison                                                                                                                                   | Outcome                                                                           | Population (year:) million | N                                        | RR(95% CI)                                                       | Won/Lose | Adjustments  |
|------------------------------------------|--------------------------------------------|----------------------------------------------------------------------------------------------------------------------------------------------|-----------------------------------------------------------------------------------|----------------------------|------------------------------------------|------------------------------------------------------------------|----------|--------------|
| Witte <sup>14</sup> <i>et al.</i> 2000   | E.C. (1996)                                | Events during the day of the last match played by the national team vs events during preceding and following 5 days                          | Mortality for AMI in The Netherlands                                              | 7.1                        | M:41<br>W:38                             | M: 1.51 (1.08–2.09)<br>W: 1.11 (0.8–1.56)                        | Lose     | 1,2,4        |
| Toubiana <sup>8</sup> <i>et al.</i> 2001 | E.C. (1996)                                | Events during the day of the last match played by the national team vs events during preceding and following 5 days                          | Mortality for AMI in France                                                       | 58.0                       | M:61<br>W:83                             | M: 0.74 (0.58–1.02)<br>W: 0.96 (0.80–1.21)                       | Won      | 2,4          |
| Brunekreef and Hoek <sup>17</sup> 2002   | E.C.(1988 and 1992)<br>W.C.(1990 and 1994) | Events during the days of five matches played by the national team in the four tournaments vs events during other days between 1986 and 1994 | Mortality for AMI in The Netherlands                                              | 6.7                        | NA                                       | M+W: 1.00(0.90–1.11)                                             | NA       | 1,2,3, 5,6,7 |
| Carroll <sup>9</sup> <i>et al.</i> 2003  | W.C. (1998)                                | Events within 2 days after a match of the national team vs events during the other days of the tournament                                    | Hospital admissions for AMI in England                                            | 58.0                       | M+W:270                                  | M:1.2(1.08-1.49)<br>W:1.16(0.85-1.59)                            | Lost     | 1,2,3,4,5    |
| Berthier and Boulay <sup>28</sup> 2003   | W.C. (1998)                                | Events during the day of the final match of the national team vs events during the preceding and following 5days                             | Mortality for AMI in France                                                       | 58.3                       | M: 23<br>W: 18                           | M:0.71(0.55–0.98)<br>W:0.65(0.45–1.16)                           | Won      | 1,2,3,4      |
| Kirkup and Merrick <sup>15</sup> 2003    | E.F.T. (1994–1999)                         | Events on days when the local team lost at home vs events on days with any other result                                                      | Mortality for AMI in some UK health authorities                                   | 2.0                        | M: 220<br>W: 202                         | M:1.28(1.11–1.47)<br>W:1.07(0.93–1.24)                           | Lost     | 2,3,4        |
| Katz <sup>19</sup> <i>et al.</i> 2005    | W.C. (1998)                                | Events during days of the tournament vs events during the preceding 33days and following 33 days                                             | Incidence of out-of-hospital cardiac arrests in selected provinces of Switzerland | 1.5                        | M+W:45<br>M: 37<br>W: 8                  | M+W: 2.00(1.32–3.02)<br>M:2.31(1.40–3.83)<br>W:1.23(0.44–3.20)   | NA       | 2,4          |
| Katz <sup>20</sup> <i>et al.</i> 2006    | W.C. (2002)                                | Events during days of the tournament vs events during the same period in 2001                                                                | Incidence of sudden cardiac death in selected provinces of Switzerland            | 1.5                        | M+W:38<br>M: 26<br>W: 12                 | M+W: 1.63(1.09–2.44)<br>M:1.77(1.09–2.86)<br>W:1.33(0.63–2.82)   | NA       | 1,4          |
| Bauman <sup>21</sup> <i>et al.</i> 2006  | A.F.L (2005)<br>W.C.Q. (2005)              | Events within 2 days after the AFL final match and after the regional World Cup                                                              | Hospital admissions for AMI in New South Wales (Australia)                        | 6.8                        | (A.F.L.)<br>M+W:79<br>(W.C.Q.)<br>M+W:71 | (A.F.L.) M+W: 1.21 (0.90–1.63)<br>(W.C.Q.) M+W: 0.81 (0.63–1.05) | NA       | 2,3          |

|                                                   |                                           |                                                                                                                                                           |                                                                                  |                                        |                             |                                                                       |      |             |
|---------------------------------------------------|-------------------------------------------|-----------------------------------------------------------------------------------------------------------------------------------------------------------|----------------------------------------------------------------------------------|----------------------------------------|-----------------------------|-----------------------------------------------------------------------|------|-------------|
|                                                   |                                           | qualifying match vs events during the preceding 14 days and following 11 days                                                                             |                                                                                  |                                        |                             |                                                                       |      |             |
| Wibert-Lampen <sup>11</sup><br><i>et al.</i> 2008 | W.C. (2006)                               | Events during days of matches played by the national team vs events during control days in the years 2003,2005 and 2006                                   | Hospital admissions for acute cardiovascular events in Bavaria (Germany)         | 1.8                                    | M: 216<br>W: 86<br>M+W:302  | M:3.26(2.78–3.84)<br>W:1.82(1.44–2.31)<br>M+W:<br>2.66(2.33–3.04)     | NA   | 1,3,4,5,6,8 |
| Kloner <sup>13</sup><br><i>Et al.</i> 2009        | Super bowl (1980 and 1984)                | Events during days and the following 14 days of matches played by the local team VS events during control days in the years 1980 to 1983 and 1984 to 1988 | Mortality for all-cause and circulatory , IHD, AMI, HF in LA (USA)               | 1980: 7.5                              | NA                          | 1.09 (0.88-1.34)                                                      | Lose | 1,2,3       |
|                                                   |                                           |                                                                                                                                                           |                                                                                  | 1984 : 8.2                             | NA                          | 0.97(0.79-1.20)                                                       | Won  |             |
| Barone-Adesi <sup>7</sup><br>2010<br>Meta         | E.C. (2004)<br>W.C.(2002 )<br>W.C.(2006 ) | Events during the day of matches played by the national team vs events during the other days of the tournaments                                           | Hospital admissions for AMI in Italy                                             | 2004: 57.4<br>2002: 57.4<br>2006: 58.8 | M+W:<br>4395                | M+W:<br>1.01(0.98–1.05)                                               | NA   | 3           |
| Vidal and Paccaud <sup>22</sup><br>2011           | E.C.( 1996、2000、2004 )<br>W.C.( 2002)     | Events during days of matches played by the national team vs events during the other days of the tournaments                                              | Hospital admissions for AMI in Portugal                                          | 10.0-10.5                              | M+W:506                     | M+W:<br>1.02 (0.92-1.13)                                              | NA   | 1,3         |
| Wibert-Lampen <sup>16</sup><br><i>et al.</i> 2011 | W.C. (2006)                               | Events during days of matches played by the national team vs events during control days in the years 2003,2005 and 2006                                   | Mortality for MI in Bavaria (Germany)                                            | 1.8                                    | M: 158<br>W: 127<br>M+W:285 | M:0.99 (0.84-1.15)<br>W:0.99 (0.82-1.19)<br>M+W:<br>0.99(0.88-1.11)   | NA   | 1,2,3,4,5,8 |
| P Marques-Vidal <sup>25</sup><br><u>2011</u>      | E.C.(1980 to 2004)<br>W.C.(1982 to 2006)  | Events during days of matches vs events during control days in the years 1980-2006                                                                        | Mortality for CHD in Switzerland                                                 | 6.3-7.6                                | NA                          | M:1.03(0.97 -1.09)<br>W:0.98(0.92-1.04)<br>M+W:<br>1.01 (0.96 - 1.05) | NA   | 1,4         |
| Schwartz <sup>26</sup><br><i>et al.</i><br>2013   | Super Bowls (2005-2009)                   | Events during days of eight consecutive days beginning Super Bowl day VS events during the non-case period Super Bowls from 2005 to 2009.                 | Mortality for circulatory disease in Massachusetts, Arizona and Pittsburgh (USA) | Massachusetts : 6.5                    | NA                          | M+W:<br>1.14 (0.78-1.66)                                              | Lose | 1,2,        |
|                                                   |                                           |                                                                                                                                                           |                                                                                  | Arizona :3.75                          | NA                          | M+W:<br>0.91 (0.49-1.69)                                              | Won  |             |
|                                                   |                                           |                                                                                                                                                           |                                                                                  | Pittsburgh: 1.2                        | NA                          | M+W:<br>0.75 (0.34-1.63)                                              | Won  |             |

|                                                |                                                  |                                                                                                                                                                                                                                        |                                                                                            |             |                  |                                                                      |      |           |
|------------------------------------------------|--------------------------------------------------|----------------------------------------------------------------------------------------------------------------------------------------------------------------------------------------------------------------------------------------|--------------------------------------------------------------------------------------------|-------------|------------------|----------------------------------------------------------------------|------|-----------|
| Borges <sup>27</sup> <i>et al.</i><br>2013     | W.C.<br>(1998,2002,<br>2006,2010)                | Events during<br>days of matches<br>played by the<br>national team<br>vs events during<br>control days in<br>the years<br>1998-2010                                                                                                    | Hospital<br>admissions for<br>ACS and<br>mortality in<br>Brazil                            | 166.3-193.3 | AMI<br>admission | M:1.16 (1.03-1.31)<br>W:1.16 (1.02-1.17)<br>M+W:<br>1.16 (1.06;1.27) | NA   | 1,4       |
|                                                |                                                  |                                                                                                                                                                                                                                        |                                                                                            |             | Mortality        | M:1.14 (0.92;1.41)<br>W:1.09 (0.86;1.38)<br>M+W:<br>1.04(0.93-1.08)  |      |           |
| Niederseer <sup>28</sup><br><i>et al.</i> 2013 | W.C. (2006)                                      | Events during<br>days of matches<br>played by the<br>national team<br>vs events during<br>control days in<br>the years 2005<br>and 2006                                                                                                | Hospital<br>admissions<br>for acute<br>cardiovascular<br>events in<br>Bavaria<br>(Germany) | 12.6        | NA               | M+W:<br>0.91 (0.74-1.13)                                             | NA   | 1,2,4,5,6 |
| Olsen <sup>9</sup><br><i>et al.</i> 2014       | RWC(1999)<br>RWC(2003)<br>RWC(2007)<br>RWC(2011) | Events during the<br>days of national<br>team's last match<br>in each RWC and<br>the 2 days after<br>each match<br>VSData for<br>equivalent days<br>for 3 years<br>preceding 2011,<br>2007 and 2003<br>RWC or<br>following 1999<br>RWC | Hospital<br>admissions<br>for ACSin New<br>Zealand                                         | 1999: 3.8   | NA               | SWC 1999<br>M+W:<br>0.9 (0.7-1.1)                                    | Lose | 1,2,3,4   |
|                                                |                                                  |                                                                                                                                                                                                                                        |                                                                                            | 2003: 4.0   | NA               | SWC 2003<br>M+W:<br>1.2 (1.0-1.5)                                    | Lose |           |
|                                                |                                                  |                                                                                                                                                                                                                                        |                                                                                            | 2007: 4.2   | NA               | SWC 2007<br>M+W:<br>0.9 (0.8-1.14)                                   | Lose |           |
|                                                |                                                  |                                                                                                                                                                                                                                        |                                                                                            | 2011: 4.4   | NA               | SWC 2011<br>M+W:<br>0.9(0.7-1.1)                                     | Won  |           |

RRs refer to the numbers of cardiovascular events on days in which major football matches were played compared with events during control periods.

N: number of events during the exposure period; E.C.: European Championship; W.C: World Cup; E.F.T: English Football Tournament; A.F.L.: Australian Football League; W.C.Q: World Cup Qualifications; R.W.C: Rugby World Cup. M: men; W: women; M+W: both genders; Win: matches won by the team; Loss: match lost by the team; NA: not available.

Adjustments : 1: year; 2 :month; 3:day of the week; 4: gender; 5: temperature; 6: air pollution; 7: influenza epidemics.; 8: barometric pressure.
