# Supplementary material for: Associations of cardiovascular disease morbidity and mortality in the populations watching major football tournaments: A systematic review and meta-analysis of observational studies
Source: PubMed Central journal article supplement (PMC7220255; doi:10.1097/md.0000000000019534), 2020-03-20
Supplement: medi-99-e19534-s003.pdf [file medi-99-e19534-s003.pdf]

| Group       | Subgroup          | Categorical data | included studies (n) | Heterogeneity test ( $I^2$ , $P$ ) | Pooled RR(95% CI) |
|-------------|-------------------|------------------|----------------------|------------------------------------|-------------------|
| Mortality   | The result of MFT | Win              | 4                    | 11%, 0.34                          | 1.17 (1.08-1.27)  |
|             |                   | Lost             | 4                    | 0%, 0.51                           | 0.88 (0.79-0.98)  |
|             | Competition type  | W.C./E.C.        | 7                    | 92%, 0.0002                        | 1.02(0.99-1.04)   |
|             |                   | Non- W.C./E.C.   | 3                    | 14%, 0.32                          | 1.12(1.03-1.21)   |
| Morbidity   | The result of MFT | Win              | 3                    | 0%, 0.57                           | 1.00 (0.89-1.11)  |
|             |                   | Lost             | 3                    | 61%, 0.04                          | 1.10 (0.94-1.28)  |
|             | Competition type  | W.C./E.C.        | 6                    | 96%, <0.00001                      | 1.32 (1.07-1.63)  |
|             |                   | Non- W.C./E.C.   | 2                    | 53%, 0.06                          | 0.98(0.86-1.12)   |
|             | Study design      | Retrospective    | 7                    | 60%, 0.004                         | 1.07(0.99-1.16)   |
| Prospective |                   | 1                | NA                   | 2.66(2.33-3.04)                    |                   |
